# Supplementary material
Source: PubMed Central journal article supplement (PMC3238463)

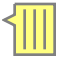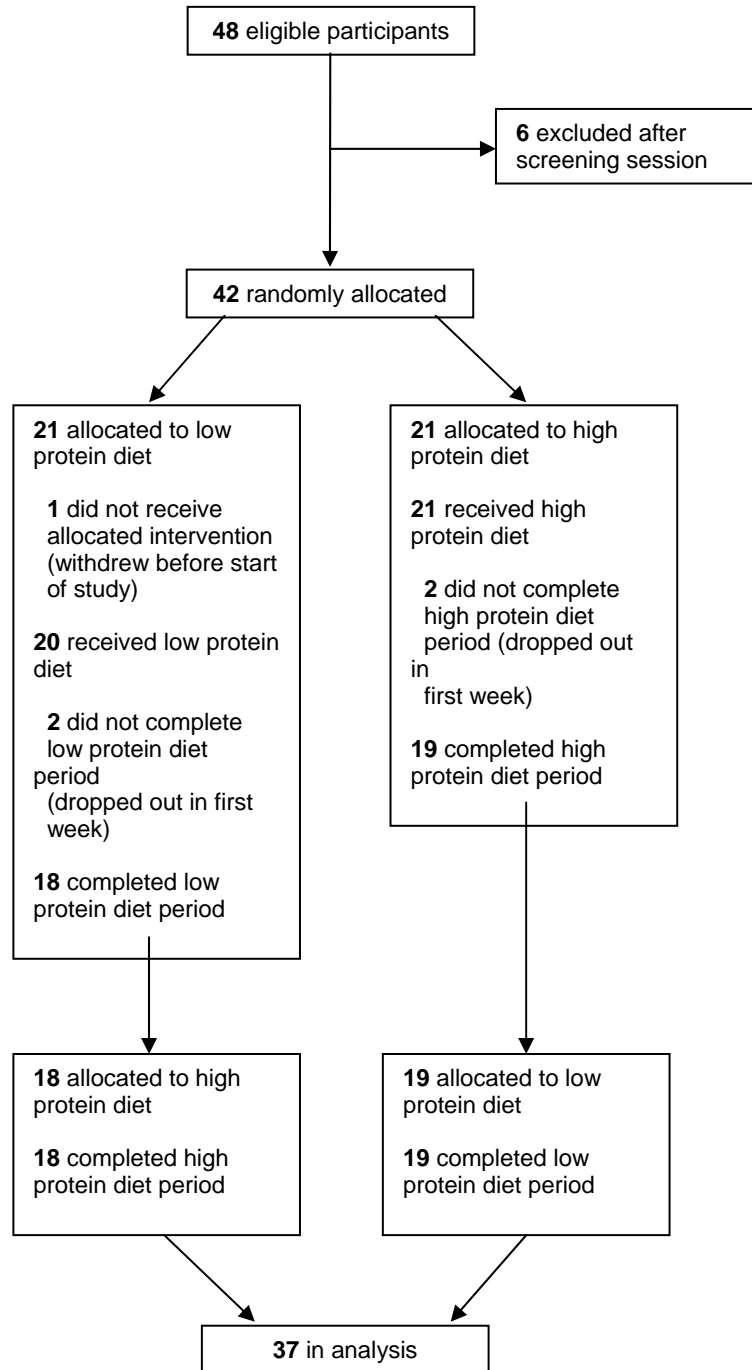

Supplement: supp_111.020503_Figure1.pdf [file supp_111.020503_Figure1.pdf]
